# Supplementary material for: Colorimetric assay of homocysteine using gold nanoparticles conjugated with thermoresponsive copolymers
Source: Royal Society of Chemistry journal article supplement (doi:10.1039/c6ay02002j), 2016-01-01
Supplement: c6ay02002j1.pdf [file c6ay02002j1.pdf]

**Index of Supplementary Information of  
“Colorimetric Assay of Homocysteine Using Gold Nanoparticles Conjugated with  
Thermoresponsive Copolymer”**

Fig. S1: pH Titration curves of 100 mL of 1 wt% poly (NIPAAm-co-DMAEMA) solutions

Fig. S2: TEM images of the gold nanoparticles conjugated with poly (NIPAAm-co-DMAEMA) in the presence and absence of homocysteine before and after heating and cooling.

Fig. S3: Photos of effect of solution pH on color of a gold nanocomposite solution a) before and b) after heating and cooling.

Fig. S4: Photos of effect of heating temperature on color of a gold nanocomposite solution at various heating time.

Fig. S5: Effects of thiol compounds on the disassembly of the gold nanocomposites.

Fig. S6: Photos of effects of the concentration of homocysteine and cysteine on the gold nanocomposite solution.

Fig. S7: Relationship between  $a^*$  value of a gold nanoparticle solution and concentration of homocysteine.

Table S1: Content of DMAEMA in poly (NIPAAm-co-DMAEMA)

Table S2: Comparison of analytical performance of determination methods of homocysteine with gold nanoparticles.

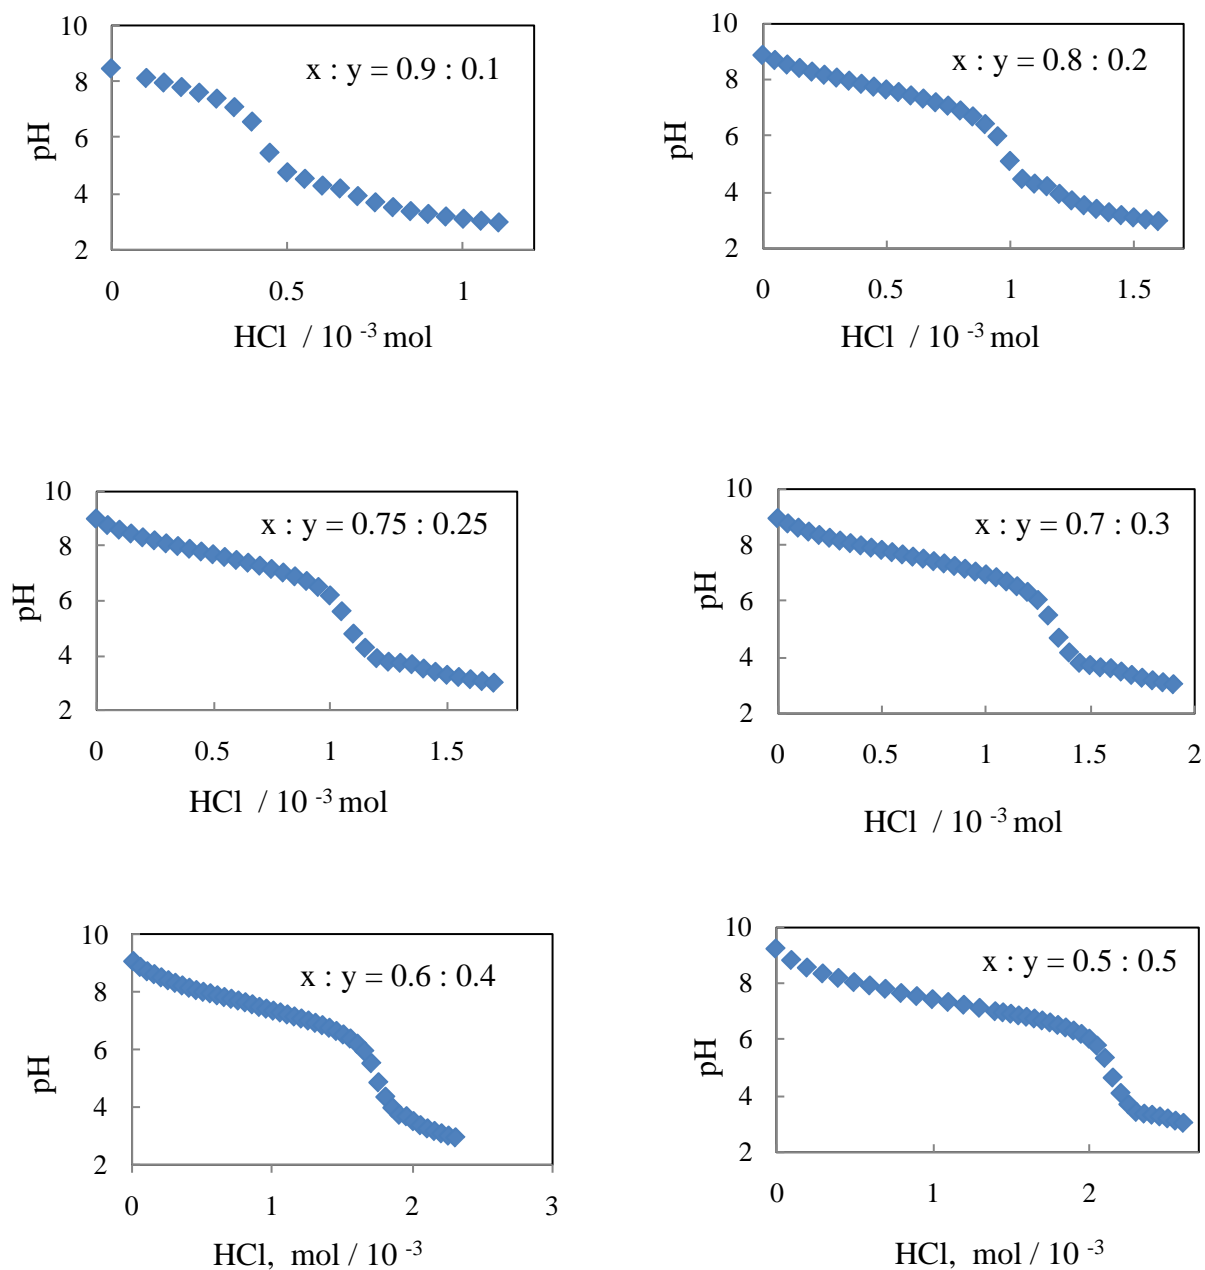

Fig. S1 pH Titration curves of 100 mL of 1 wt% poly (NIPAAm -co-DMAEMA) solutions

a) In the presence of homocysteine

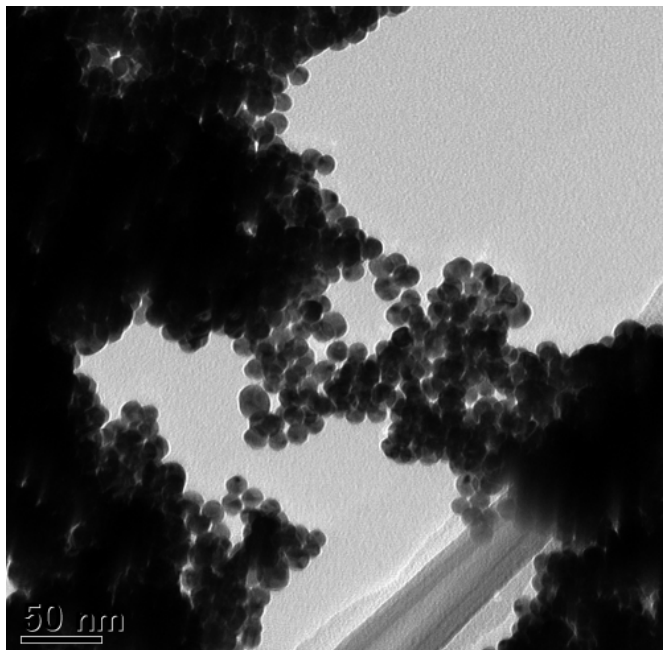

a) In the absence of homocysteine

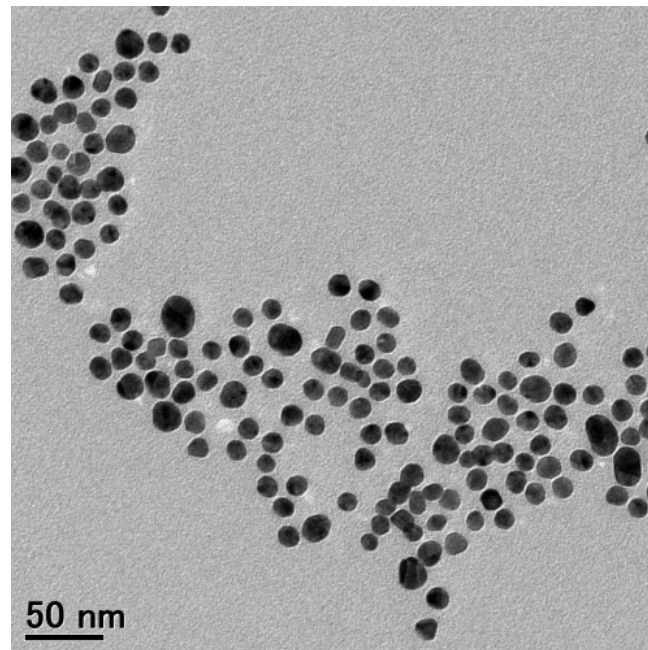

Fig. S2 TEM images of the gold nanoparticles conjugated with poly (NIPAAm-co-DMAEMA) a) in the presence and b) in the absence of homocysteine before and after heating and cooling.

The gold nanocomposite solution contains a)  $1 \times 10^{-4}$  mol/L homocysteine, b) no homocysteine, and 0.054 g/L gold nanoparticles conjugated with 0.05 wt % poly(*N*-isopropylacrylamide (90 mol %)-co-2-(dimethylamino)-ethyl methacrylate(10 mol %)) were used.

a) Before heating and cooling

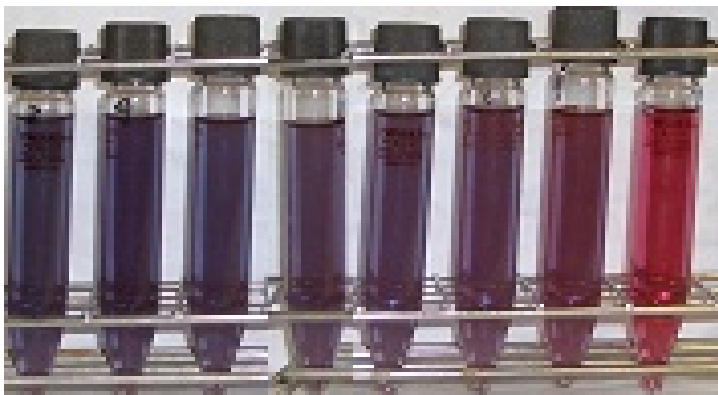

3.1 4.0 5.1 6.1 7.1 8.1 9.0 10.1  
pH

b) After heating and cooling

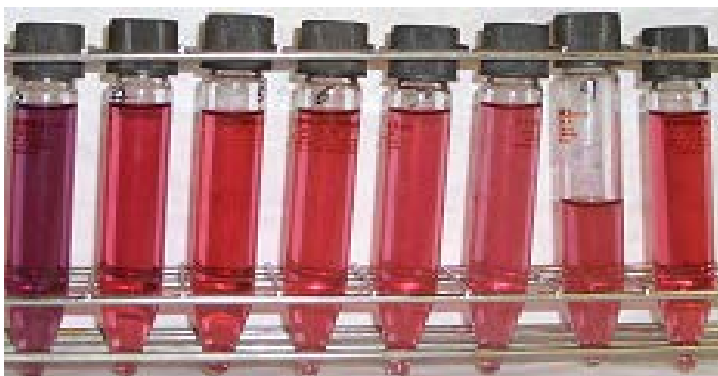

3.1 4.0 5.1 6.1 7.1 8.1 9.0 10.1  
pH

Fig. S3 Photos of effect of solution pH on color of a gold nanocomposite solution a) before and b) after heating and cooling. The data correspond to Fig. 4 in the text.

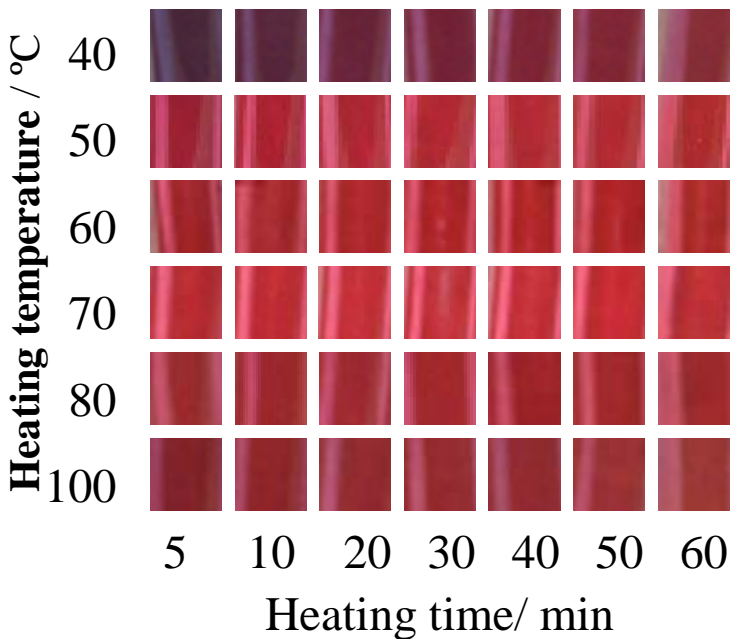

Fig. S4 Photos of effect of heating temperature on color of a gold nanocomposite solution at various heating time.

The data correspond to Fig. 5 in the text.

Fig. S5-1 Effects of thiol compounds on the disassembly of the gold nanocomposites

| Thiol compound              | Without heating                                                                     | With heating and cooling                                                            | Type of effects |
|-----------------------------|-------------------------------------------------------------------------------------|-------------------------------------------------------------------------------------|-----------------|
| Control                     |    |    | ---             |
| Thioglycolic acid           |    |    | Facilitation    |
| Ethylthioglycolate          |    |    | Inhibition      |
| 3-Mercaptopropionic acid    |    |    | Facilitation    |
| Ethyl-3-mercaptopropionate  |    |    | Inhibition      |
| Butanethiol                 |    |    | No effect       |
| Octanethiol                 |   |   | Inhibition      |
| <i>n</i> -Dodecylmercaptane |  |  | Inhibition      |
| 1, 2-Etanedithiol           |  |  | Inhibition      |
| 2-Mercaptoethanol           |  |  | Inhibition      |
| 2,3-Dimercapto-1-propanol   |  |  | Inhibition      |
| 3-Mercapto-1,2-propandiol   |  |  | Inhibition      |

*Continued to S5-2*

Fig. S5-2 Effects of thiol compounds on the disassembly of the gold nanocomposites (continued)

| Thiol compound                | With heating                                                                        | Without heating and cooling                                                         | Type of effects |
|-------------------------------|-------------------------------------------------------------------------------------|-------------------------------------------------------------------------------------|-----------------|
| 2-Aminoethanethiol            |    |    | Inhibition      |
| 4-Aminothiophenol             |    |    | Inhibition      |
| $\alpha$ -Toluenethiol        |    |    | Inhibition      |
| Reduced glutathione           |    |    | Facilitation    |
| Cysteinylglycine              |    |    | Facilitation    |
| Cysteine                      |    |    | No effect       |
| Homocysteine                  |   |   | Inhibition      |
| <i>N</i> -Acetylcysteine      |  |  | No effect       |
| Penicillamine                 |  |  | Inhibition      |
| <i>N</i> -Acetylpenicillamine |  |  | Inhibition      |
| Glutamylcysteine              |  |  | No effect       |

The gold nanocomposite solution contains 0.054 g/L gold nanoparticles conjugated with 0.05 wt % poly(*N*-isopropylacrylamide (90 mol %)-co-2-(dimethylamino)-ethyl methacrylate(10 mol %)). The solution was heated at 90 °C for 30 min then cooled at 4 °C for 10 min.

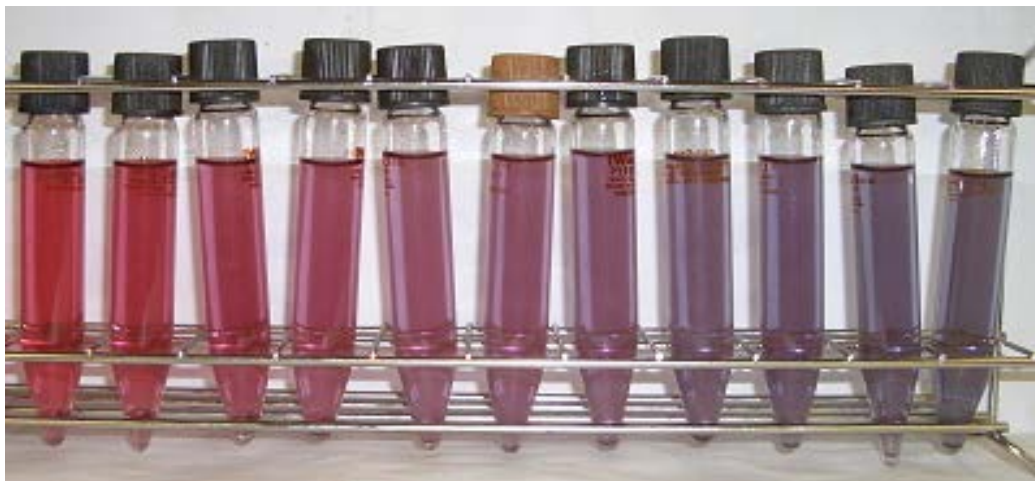

0 1 2 3 4 5 6 7 8 9 10

[homocysteine] /  $10^{-6}$  mol/L

Fig. S6 Photos of effects of the concentration of homocysteine and cysteine on the gold nanocomposite solution.

The data correspond to Fig. 6 in the text.



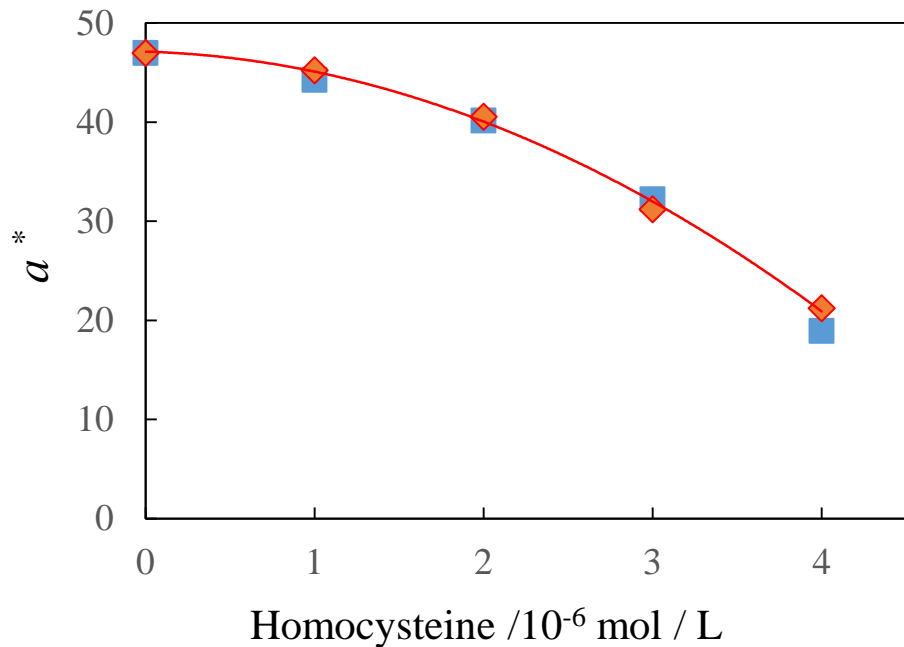

Fig. S7 Relationship between  $a^*$  value of a 0.054 g/L gold nanoparticle solution containing 0.05 wt % poly(*N*-isopropylacrylamide (90 mol %)-co-2-(dimethylamino)-ethyl methacrylate (10 mol %)) and concentration of homocysteine.

( $\blacklozenge$ ), in a standard solution and ( $\blacksquare$ ), in a bovine serum sample.

Table S1 Content of DMAEMA in poly (NIPAAm-co-DMAEMA)

| Thermo-responsive polymers        |            | DMAEMA / mol% |
|-----------------------------------|------------|---------------|
| poly (NIPAAm-co-DMAEMA) (90 : 10) | fed        | 10            |
|                                   | found      | 5.7           |
| poly (NIPAAm-co-DMAEMA) (80 : 20) | fed        | 20            |
|                                   | found      | 11.9          |
| poly (NIPAAm-co-DMAEMA) (75 : 25) | calculated | 25            |
|                                   | found      | 12.9          |
| poly (NIPAAm-co-DMAEMA) (70 : 30) | calculated | 30            |
|                                   | found      | 15.4          |
| poly (NIPAAm-co-DMAEMA) (60 : 40) | calculated | 40            |
|                                   | found      | 20.6          |
| poly (NIPAAm-co-DMAEMA) (50 : 50) | calculated | 50            |
|                                   | found      | 23.9          |
| poly (NIPAAm-co-DMAEMA) (25 : 75) | calculated | 75            |
|                                   | found      | 35.0          |

Table S2 Comparison of analytical performance of determination methods of homocysteine with gold nanoparticles

| Technique                       | Linear range             | detection limit    | Sample        | Reference |
|---------------------------------|--------------------------|--------------------|---------------|-----------|
| Colorimetry (Red to blue)       | 0.2 – 0.5 $\mu\text{M}$  | 95.2 nM            | N.A.          | [31]      |
| Spectrophotometry (Red to blue) | 0.05 – 5 $\mu\text{M}$   | 10.9 nM            | N.A.          | [31]      |
| Mass spectrometry               | N.A.                     | 34 nM              | Plasma        | [35]      |
| Post-column HPLC (aggregation)  | 5-43 $\mu\text{M}$       | 3 $\mu\text{M}$    | Plasma, Urine | [30]      |
| Spectrophotometry (Red to blue) | 0.2 – 3.0 $\mu\text{M}$  | 0.15 $\mu\text{M}$ | Plasma, Urine | [33]      |
| Post-column HPLC (CL detection) | 0.02 – 0.5 $\mu\text{M}$ | 0.6 nM             | Plasma, Urine | [36]      |
| Light scattering (aggregation)  | 0.08 - 6.0 $\mu\text{M}$ | 0.04 $\mu\text{M}$ | Urine         | [37]      |
| Post-column HPLC (aggregation)  | 5.0-50 $\mu\text{M}$     | 0.24 $\mu\text{M}$ | Urine         | [38]      |
| Spectrophotometry (Red to blue) | 1.0 – 4.0 $\mu\text{M}$  | N.A.               | Plasma, Urine | [39]      |
